# Supplementary material
Source: PubMed Central journal article supplement (PMC7161038)
Supplement: ao0c00424_si_001.pdf [file ao0c00424_si_001.pdf]

## Supporting Information

### «Synthesis of organic-inorganic hybrids based on perovskite-like bismuth titanate $\text{H}_2\text{K}_{0.5}\text{Bi}_{2.5}\text{Ti}_4\text{O}_{13}\cdot\text{H}_2\text{O}$ and *n*-alkylamines»

Iana A. Minich,<sup>†</sup> Oleg I. Silyukov,<sup>\*,†</sup> Veronika V. Gak,<sup>†</sup> Evgeny V. Borisov,<sup>‡</sup> Irina A. Zvereva<sup>†</sup>

<sup>†</sup>Institute of Chemistry, St. Petersburg State University, 198504, St. Petersburg, Russia

<sup>‡</sup>Center for Optical and Laser Materials Research, St. Petersburg State University, 198504, St. Petersburg, Russia

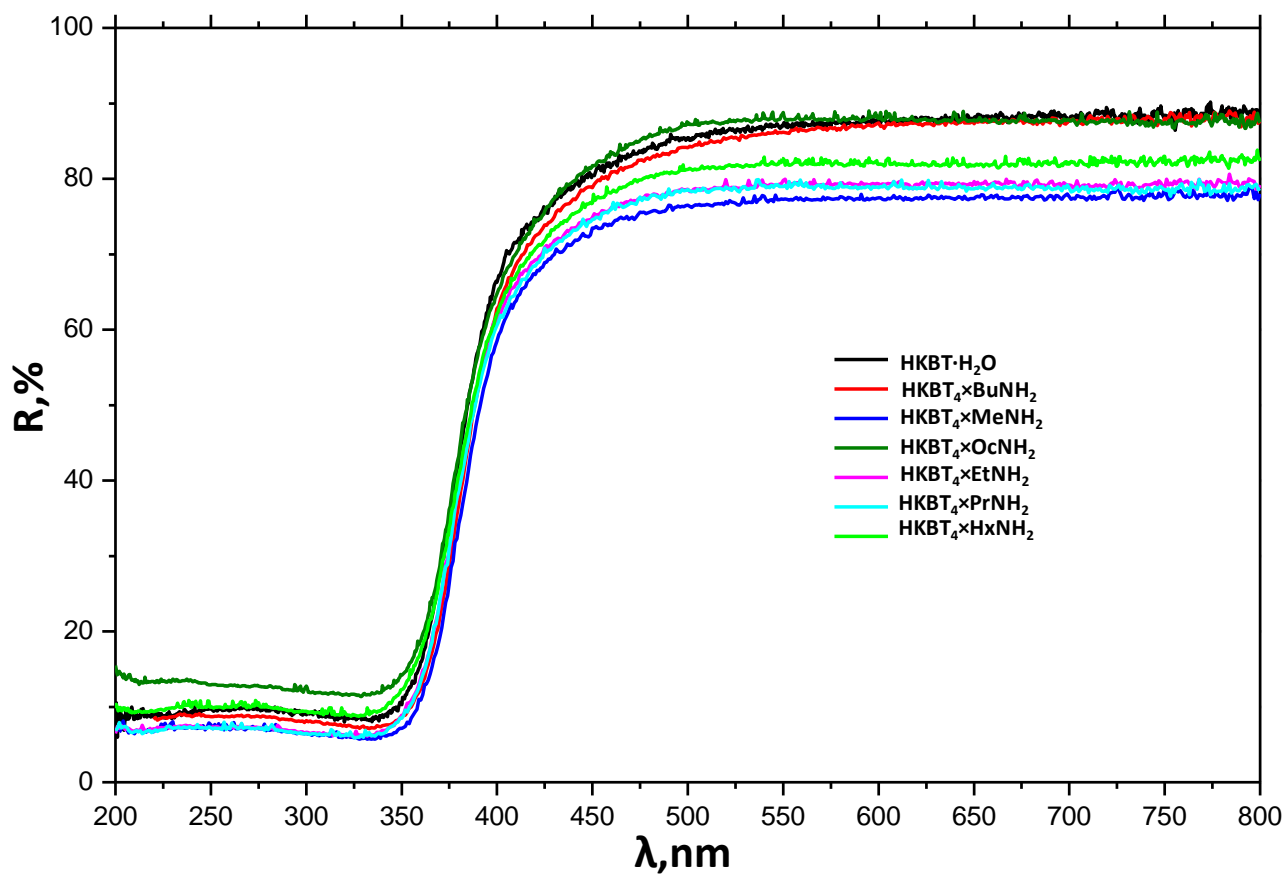

**Figure S1.** Diffuse reflectance spectra of initial protonated titanates and their inorganic-organic hybrids. DRS was performed on the Shimadzu UV-2550 spectrometer with ISR-2200 integrating sphere attachment. Obtained DRS were used to calculate the optical band gaps  $E_g$  of the samples presented on Table 1 in the main text.
